# Supplementary material for: Comparison of pathologic outcomes of robotic and open resections for rectal cancer: A systematic review and meta-analysis
Source: PLOS journal article supplement (doi:10.1371/journal.pone.0245154), 2021-01-13

## urinary infection

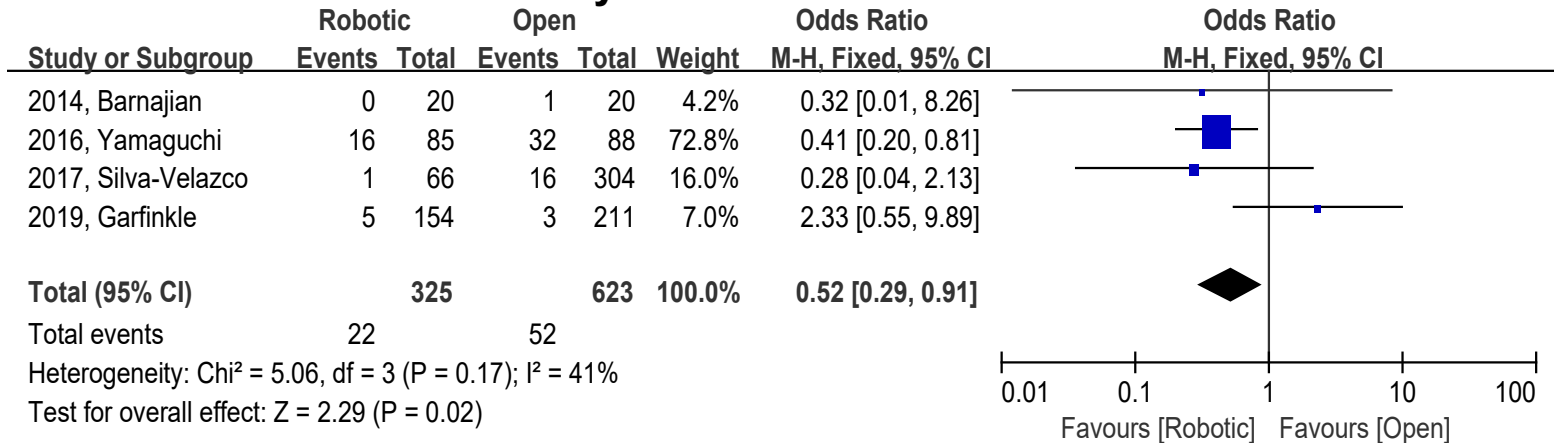

Supplement: S6 (10.1371/journal.pone.0245154.s006) [file journal.pone.0245154.s006]
